# Supplementary material for: Three‐dimensional CeO 2 @carbon‐quantum‐dots scaffold modified with Au nanoparticles on flexible substrates for high performance gas sensing at room temperature
Source: Springer Nature journal article supplement (doi:10.1007/s12598-023-02283-3), 2023-03-02
Supplement: 12598_2023_2283_MOESM1_ESM.pdf [file 12598_2023_2283_MOESM1_ESM.pdf]

Supporting Information

**Three-dimensional  $\text{CeO}_2$ @carbon-quantum-dots scaffold modified with Au nanoparticles on flexible substrates for high performance gas sensing at room temperature**

Chao Wang\*, Long Zhang, Bing He, Quan Zhou, Shao-Hui Zhang, Xiu-Li Kong, Zhen Chen, Ge-Bo Pan\*

C. Wang\*, X.-L. Kong, Z.Chen  
School of Chemistry and Pharmaceutical Engineering, Shandong First Medical University & Shandong Academy of Medical Sciences, Tai'an 271016, China  
e-mail: chaowang2017@sinano.ac.cn

L. Zhang, Q. Zhou, G.-B. Pan\*  
Division of Interdisciplinary and Comprehensive Research, Suzhou Institute of Nano-Tech and Nano-Bionics, Chinese Academy of Sciences, Suzhou 215123, China  
e-mail: gbpan2008@sinano.ac.cn

B. He  
School of Electrical and Electronic Engineering, Nanyang Technological University, 50 Nanyang Avenue, Singapore 639798, Singapore

S.-H. Zhang  
Institute of Microscale Optoelectronics, Shenzhen University, Shenzhen 518060, China

## 1. Materials

Fresh bamboo leaves (Suzhou Institute of Nano-Tech and Nano-Bionics, China), sodium hydroxide (NaOH, 99%, AR), cerium (III) nitrate hexahydrate ( $\text{Ce}(\text{NO}_3)_3 \cdot 6\text{H}_2\text{O}$ , 99%, AR), gold chloride trihydrate ( $\text{HAuCl}_4 \cdot 3\text{H}_2\text{O}$ , 99.9%, metals basis) and ethanol ( $\text{C}_2\text{H}_5\text{OH}$ , 99%, AR) were used to prepare sensing materials. Except for bamboo leaves, other reagents were commercially available and used without any further purification.

## 2. Characterization of as-prepared samples

The surface morphology and elemental analysis of as-prepared CQDs and Au/CeO<sub>2</sub>@CQDs were determined by scanning electron microscopy (SEM, Hitachi S-4800) and energy dispersive X-ray spectroscopy (EDS, Quanta FEG 250), respectively. The crystal structure of CeO<sub>2</sub>@CQDs and Au/CeO<sub>2</sub>@CQDs were carried out by X-ray diffraction at a scanning rate of  $0.1^\circ \text{ s}^{-1}$ , using Cu K $\alpha$  radiation (XRD, Bruker D8 Advance power X-ray diffractometer). The chemical composition of samples was characterized by X-ray photoelectron spectrometer (ESCALab MKII). The surface morphology, elemental mapping and crystal structure of as-prepared Au/CeO<sub>2</sub>@CQDs was also obtained by transmission electron microscopy (TEM) and high-resolution transmission electron microscopy (HRTEM, Tencnai G2 F20 S-TWIN) images, respectively. The size of the CQDs NPs was characterized with a Malvern Zetasizer instrument (Malvern, Zetasizer Nano, UK).

## 3. Gas sensing test system in different humidity environments

A cylinder of 100 ppm NO<sub>2</sub> (Air Products) balanced by nitrogen was used. Mass flow controllers (MFCs, Sevenstar CS200, China) controlled were employed to dilute the 100 ppm NO<sub>2</sub> in a chamber to desired concentration using air with different humidity, which was controlled by a KickStart software through general purpose interface bus. The mixed gases were delivered to the chamber with a constant flow rate of 400 sccm. Before and after exposure of the sensor to NO<sub>2</sub>, the chamber was purged with dry air.

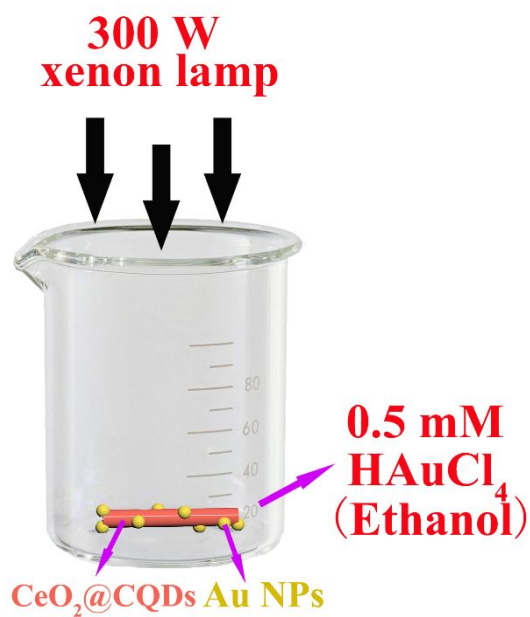

Fig.S1 Schematic diagram of photodeposition of Au NPs.

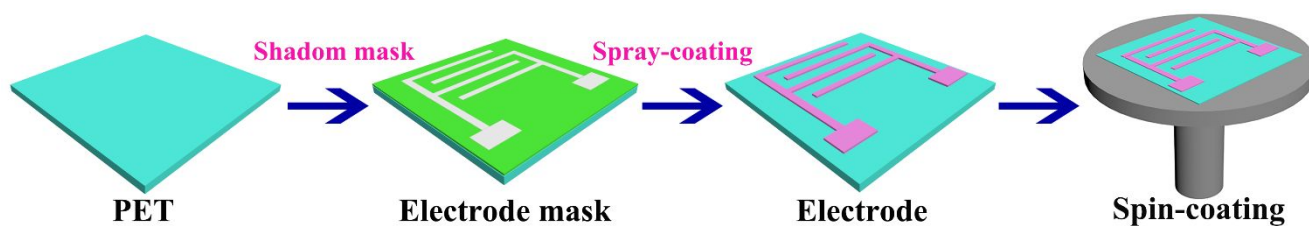

Fig.S2 Schematic illustrations of preparing a PET substrate with Au interdigital electrodes.

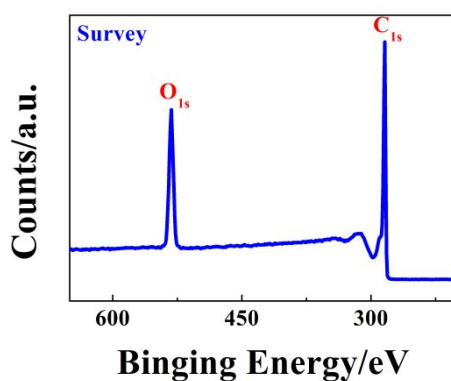

Fig.S3 XPS full survey spectra of CQDs.

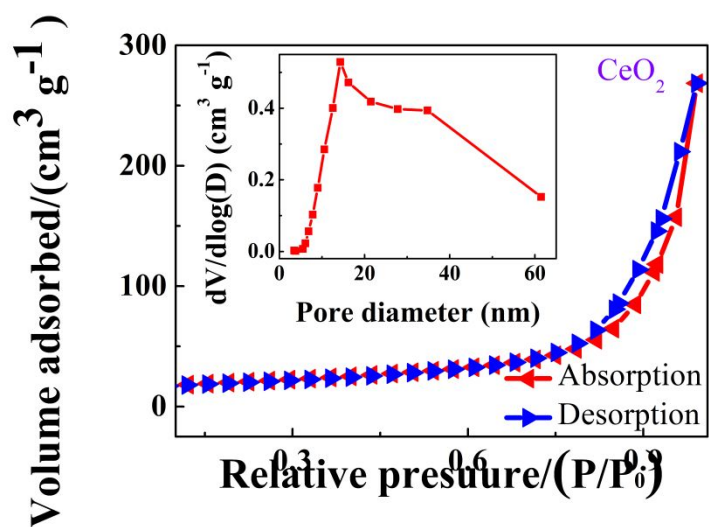

Fig.S4 Nitrogen adsorption–desorption isotherms of pure  $\text{CeO}_2$  (the inset plot displays BJH desorption pore-size distribution of pure  $\text{CeO}_2$ ).

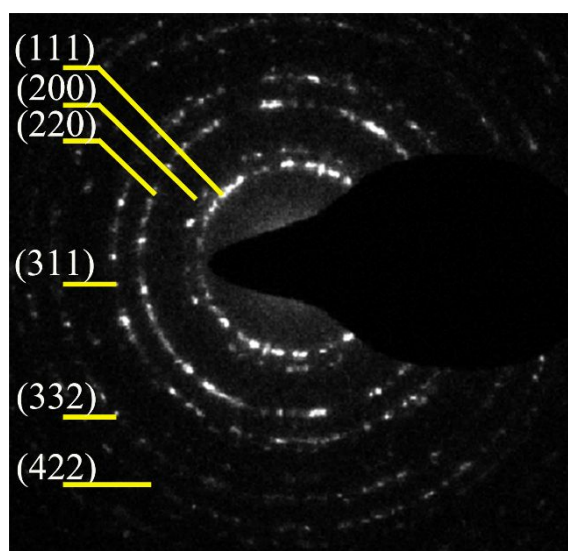

Fig.S5 Selected area electron diffraction (SAED) pattern of  $\text{CeO}_2@CQDs$ .

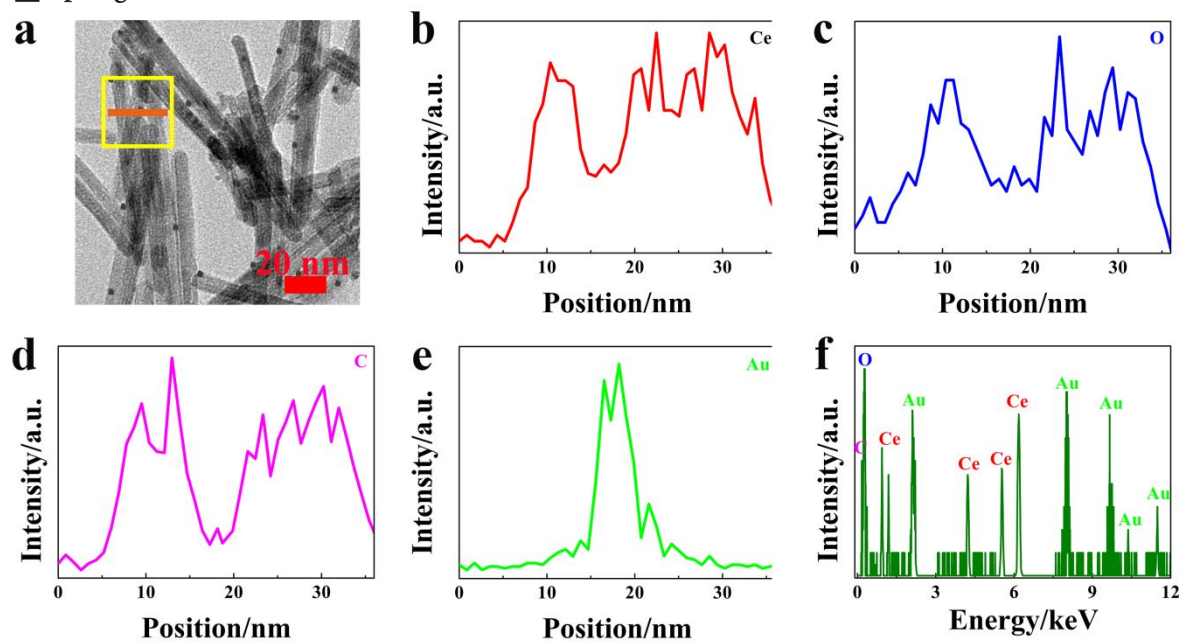

Fig.S6 **a** TEM image of Au/CeO<sub>2</sub>@CQDs. **b–e** Line-scan profiles of Ce, O, C and Au element distribution in as-prepared sample corresponding to Figure S6a (marked by red line). **f** EDS spectrum of Au/CeO<sub>2</sub>@CQDs.

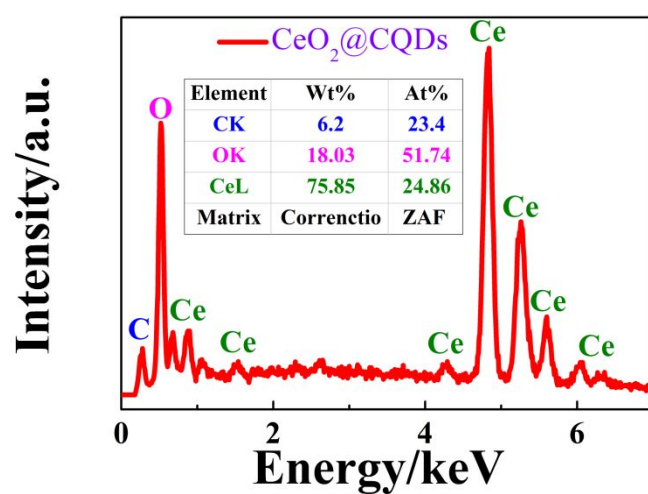

Fig.S7 EDX spectrum of CeO<sub>2</sub>@CQDs

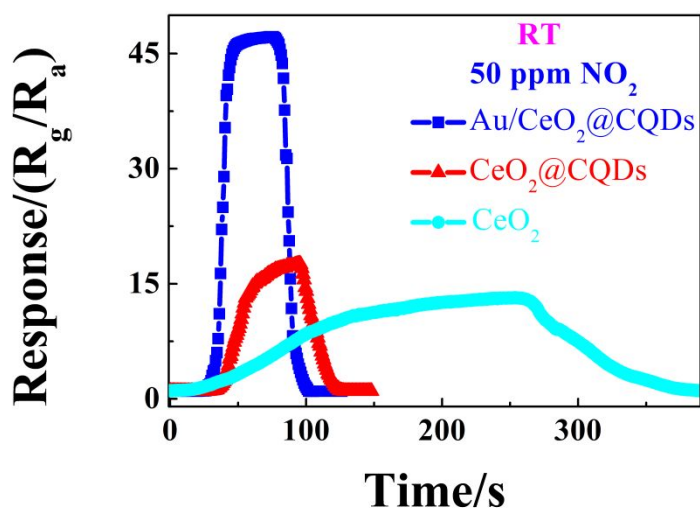

Fig.S8 Response curves of devices based on pure  $\text{CeO}_2$ ,  $\text{CeO}_2@CQDs$  and  $\text{Au/CeO}_2@CQDs$ .

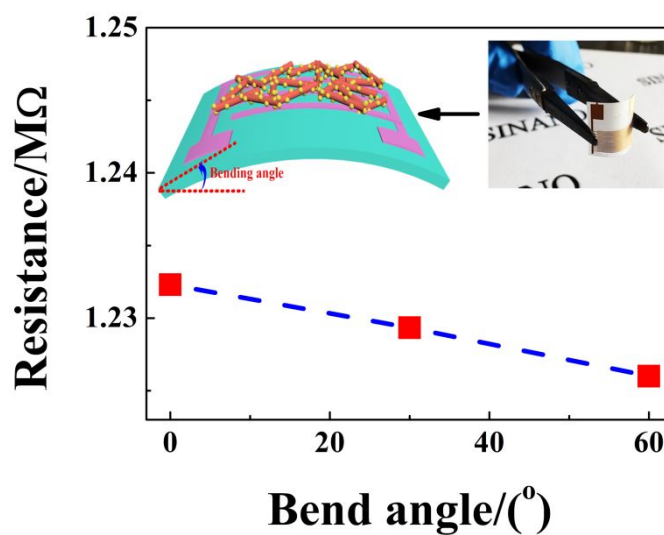

Fig.S9 Flexibility of  $\text{Au/CeO}_2@CQDs$  gas sensor on PET substrate: The resistance of the sensor in air under different bending angles. Inset: Image of the bent sensor.

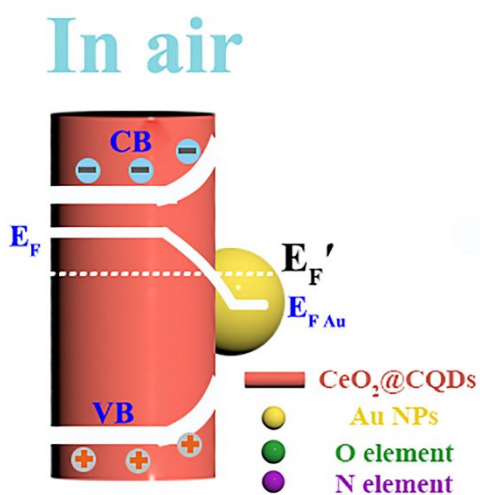

Fig.S10 Schematic presentation of electron transportation of Au/CeO<sub>2</sub>@CQDs exposed to air.

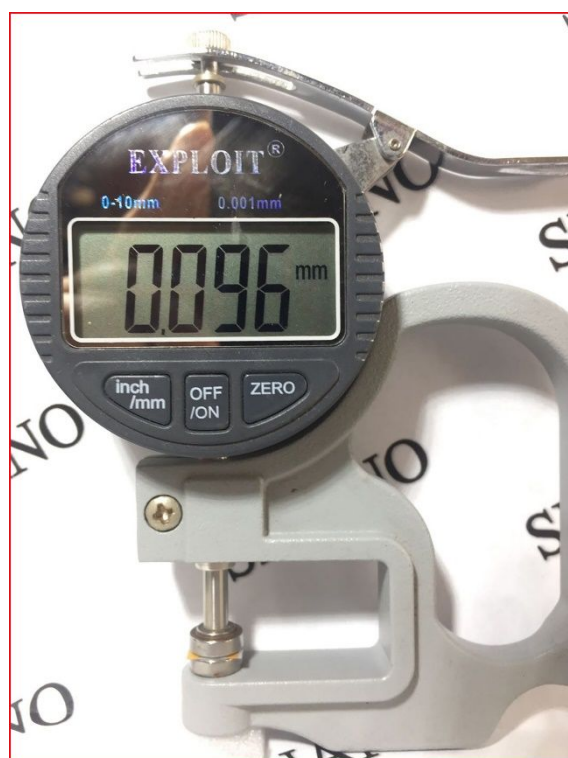

Fig.S11 Photograph of gas sensor thickness measurement.

Table S1 NO<sub>2</sub> sensing performance of different sensing materials.

| Materials                          | Gas concentration (ppm) | Sensor response (R <sub>a</sub> /R <sub>g</sub> ) | Response time (s) | Recovery time (s) | Operating temperature (°C) | Reference        |
|------------------------------------|-------------------------|---------------------------------------------------|-------------------|-------------------|----------------------------|------------------|
| Au/CeO <sub>2</sub> @CQDs          | 50                      | 47                                                | 18                | 22                | RT                         | <b>This work</b> |
| C-CeO <sub>2</sub> nanoparticles   | 40                      | 2.2                                               | 240               | 438               | 100                        | [1]              |
| CeO <sub>2</sub> -NiO              | 125                     | 67.34%                                            | 28                | 54                | 125                        | [2]              |
| UV-RGO/CeO <sub>2</sub>            | 10                      | 234                                               | -                 | 258               | RT                         | [3]              |
| Au/Pd@ZNWs                         | 1                       | 210%                                              | 35                | 30                | 100                        | [4]              |
| UV-WSe <sub>2</sub>                | 5                       | 35                                                | 76                | 109               | RT                         | [5]              |
| AuPt/SnSe <sub>2</sub>             | 8                       | 4.62                                              | 82                | 137               | 130                        | [6]              |
| CeO <sub>2</sub> /SnO <sub>2</sub> | 100                     | 37                                                | 2                 | 70                | 225                        | [7]              |
| CeO <sub>2</sub> /graphene         | 200                     | 48                                                | 181               | 246               | RT                         | [8]              |

**Notes:** – means Not reported.

## Reference

- [1] Oosthuizen D. N., Motaung D. E. and Swart H. C., Gas sensors based on CeO<sub>2</sub> nanoparticles prepared by chemical precipitation method and their temperature-dependent selectivity towards H<sub>2</sub>S and NO<sub>2</sub> gases, *Applied Surface Science*. 2020; 505:144356. <https://doi.org/10.1016/j.apsusc.2019.144356>.
- [2] Kabure A. A., Shirke B. S., Mane S. R. and Garadkar K. M., Microwave-assisted sol-gel synthesis of CeO<sub>2</sub>-NiO nanocomposite based NO<sub>2</sub> gas sensor for selective detection at lower operating temperature, *Journal of the Indian Chemical Society*. 2022; 99(3):100369. <https://doi.org/10.1016/j.jics.2022.100369>.
- [3] Hu J., Zou C., Su Y., Li M., Ye X., Cai B., Kong E. S. W., Yang Z. and Zhang Y., Light-assisted recovery for a highly-sensitive NO<sub>2</sub> sensor based on RGO-CeO<sub>2</sub> hybrids, *Sensors and Actuators B: Chemical*. 2018; 270:119. <https://doi.org/10.1016/j.snb.2018.05.027>.
- [4] Chen X., Shen Y., Zhou P., Zhong X., Li G., Han C., Wei D. and Li S., Bimetallic Au/Pd nanoparticles decorated ZnO nanowires for NO<sub>2</sub> detection, *Sensors and Actuators B: Chemical*. 2019; 289. <https://doi.org/10.1016/j.snb.2019.03.095>.
- [5] Lu G. C., Liu X. H., Zheng W., Xie J. Y., Li Z. S., Lou C. M., Lei G. L. and Zhang J., UV-activated single-layer WSe<sub>2</sub> for highly sensitive NO<sub>2</sub> detection, *Rare Metals*. 2022; 41(5):1520. <https://doi.org/10.1007/s12598-021-01899-7>.
- [6] Liu W., Gu D. and Li X., AuPt bimetal-functionalized SnSe<sub>2</sub> microflower-based sensors for detecting sub-ppm NO<sub>2</sub> at low temperatures, *ACS Applied Materials & Interfaces*. 2021; 13(17):20336. <https://doi.org/10.1021/acsami.1c02500>.
- [7] Liu J., Dai M., Wang T., Sun P., Liang X., Lu G., Shimanoe K. and Yamazoe N., Enhanced gas sensing properties of SnO<sub>2</sub> hollow spheres decorated with CeO<sub>2</sub> nanoparticles heterostructure composite materials, *ACS Applied Materials & Interfaces*. 2016; 8(10):6669. <https://doi.org/10.1021/acsami.6b00169>.
- [8] Zhang L., Fang Q., Huang Y., Xu K., Chu P. K. and Ma F., Oxygen Vacancy Enhanced Gas-Sensing Performance of CeO<sub>2</sub>/Graphene Heterostructure at Room Temperature, *Analytical Chemistry*. 2018; 90(16). <https://doi.org/10.1021/acs.analchem.8b01768>.
